# Supplementary material for: Leveraging information between multiple population groups and traits improves fine-mapping resolution
Source: PubMed Central journal article supplement (PMC10638399; doi:10.1038/s41467-023-43159-5), 2023-11-10
Supplement: 41467_2023_43159_MOESM3_ESM.pdf [file 41467_2023_43159_MOESM3_ESM.pdf]

## **Description of Additional Supplementary Files**

File Name: Supplementary Data 1

Description: Detailed results and summaries from the GLGC fine-mapping of four lipids traits across five population groups.
